# Supplementary material for: Fluorescent cadmium complexes based on N-succinopyridine ligand: syntheses, structures and tunable photoluminescence by variation of excitation light
Source: Royal Society of Chemistry journal article supplement (doi:10.1039/c2ce25755f), 2012-01-01
Supplement: c2ce25755f.pdf [file c2ce25755f.pdf]

## Fluorescent Cadmium Complexes Based on N-Succinopyridine Ligand: Synthesis, Structures, and Tunable Photoluminescence by Variation of Excitation Light

Li-Zhen Cai,<sup>a,b</sup> Ming-Sheng Wang,<sup>a</sup> Ming-Jian Zhang,<sup>a</sup> Guan-E Wang,<sup>a</sup> Guo-Cong Guo,<sup>\*a</sup> and Jin-Shun Huang<sup>a</sup>

*a* State Key Laboratory of Structural Chemistry, Fujian Institute of Research on the Structure of Matter, Chinese Academy of Sciences, Fuzhou, Fujian 350002, P. R. China

*b* Key Laboratory of Coal to Ethylene Glycol and Its Related Technology, Chinese Academy of Sciences, Fuzhou, Fujian 350002, P. R. China

**Table S1.** Selected bond lengths (Å) and angles (°) for **1** and **2**.

### **1**

|                     |            |
|---------------------|------------|
| Cd(1)-O(2W)         | 2.258(4)   |
| Cd(1)-O(1W)         | 2.426(4)   |
| Cd(1)-Cl(2)         | 2.561(2)   |
| Cd(1)-Cl(1)         | 2.596(1)   |
| Cd(1)-Cl(2)#1       | 2.613(1)   |
| Cd(1)-Cl(1)#2       | 2.715(2)   |
| O(2W)-Cd(1)-O(1W)   | 86.90(17)  |
| O(2W)-Cd(1)-Cl(2)   | 172.60(13) |
| O(1W)-Cd(1)-Cl(2)   | 88.32(12)  |
| O(2W)-Cd(1)-Cl(1)   | 90.78(11)  |
| O(1W)-Cd(1)-Cl(1)   | 88.36(11)  |
| Cl(2)-Cd(1)-Cl(1)   | 94.75(5)   |
| O(2W)-Cd(1)-Cl(2)#1 | 85.71(12)  |
| O(1W)-Cd(1)-Cl(2)#1 | 83.78(11)  |

---

\* Author to whom correspondence should be addressed. E-mail: gcguo@fjirsm.ac.cn (G.-C.Guo).

|                       |            |
|-----------------------|------------|
| Cl(2)-Cd(1)-Cl(2)#1   | 88.15(4)   |
| Cl(1)-Cd(1)-Cl(2)#1   | 171.55(4)  |
| O(2W)-Cd(1)-Cl(1)#2   | 92.47(13)  |
| O(1W)-Cd(1)-Cl(1)#2   | 172.71(10) |
| Cl(2)-Cd(1)-Cl(1)#2   | 91.55(5)   |
| Cl(1)-Cd(1)-Cl(1)#2   | 98.91(3)   |
| Cl(2)#1-Cd(1)-Cl(1)#2 | 88.93(5)   |

---

## 2

|                       |            |
|-----------------------|------------|
| Cd(1)-O(1W)           | 2.297(5)   |
| Cd(1)-O(2W)           | 2.318(5)   |
| Cd(1)-Br(2)           | 2.757(1)   |
| Cd(1)-Br(2)#1         | 2.780(1)   |
| Cd(1)-Br(1)           | 2.781(1)   |
| Cd(1)-Br(1)#2         | 2.781(1)   |
| O(1W)-Cd(1)-O(2W)     | 176.29(19) |
| O(1W)-Cd(1)-Br(2)     | 89.96(13)  |
| O(2W)-Cd(1)-Br(2)     | 89.20(14)  |
| O(1W)-Cd(1)-Br(2)#1   | 88.97(14)  |
| O(2W)-Cd(1)-Br(2)#1   | 92.10(14)  |
| Br(2)-Cd(1)-Br(2)#1   | 176.30(4)  |
| O(1W)-Cd(1)-Br(1)     | 86.75(13)  |
| O(2W)-Cd(1)-Br(1)     | 89.75(13)  |
| Br(2)-Cd(1)-Br(1)     | 96.54(4)   |
| Br(2)#1-Cd(1)-Br(1)   | 86.93(4)   |
| O(1W)-Cd(1)-Br(1)#2   | 91.64(13)  |
| O(2W)-Cd(1)-Br(1)#2   | 91.93(14)  |
| Br(2)-Cd(1)-Br(1)#2   | 87.37(4)   |
| Br(2)#1-Cd(1)-Br(1)#2 | 89.13(4)   |
| Br(1)-Cd(1)-Br(1)#2   | 175.77(4)  |

---

Symmetry codes for **1**: #1  $x+2, -y+2, -z$ ; #2  $x, -y+3/2, z-1/2$ ; #3  $x, -y+3/2, z+1/2$ ; for **2**: #1  $x+1/2, -y+3/2, -z+1$ ; #2  $x-1/2, -y+3/2, -z+1$ .

**Table S2.** Specified hydrogen bonds for **1** (with esds except fixed and riding H).

| <b>1</b>  |           |           |        |                    |
|-----------|-----------|-----------|--------|--------------------|
| D-H       | H...A     | D...A     | <(DHA) | D-H...A            |
| 0.847(10) | 1.894(13) | 2.736(5)  | 172(5) | O2W-H2WA...O4_\$3  |
| 0.842(10) | 1.963(17) | 2.793(5)  | 168(6) | O2W-H2WB...O4_\$2  |
| 0.82      | 1.62      | 2.425(5)  | 168.1  | O3-H3B...O1_\$1    |
| 0.844(10) | 2.53(3)   | 3.293(4)  | 150(5) | O1W-HIWB...C11_\$4 |
| <b>2</b>  |           |           |        |                    |
| D-H       | H...A     | D...A     | <(DHA) | D-H...A            |
| 0.82      | 1.65      | 2.465(8)  | 177.6  | O3-H3B...O2_\$1    |
| 0.850(10) | 2.39(3)   | 2.814(8)  | 111(8) | O1W-H1WA...O3_\$2  |
| 0.850(9)  | 2.48(4)   | 2.927(8)  | 114    | O2W-H2WA...O4_\$3  |
| 0.850(9)  | 2.51(3)   | 3.232(8)  | 143    | O2W-H2WA...O2      |
| 0.93      | 2.84      | 3.658(10) | 147.0  | C1-H1A...Br1_\$6   |

Symmetry codes for **1**: \$1  $x, y, z+1$ ; \$2  $x, y, z-1$ ; \$3  $x, -y+3/2, z-1/2$ ; \$4  $x, -y+3/2, z+1/2$ ; for **2**: \$1  $x+1, y, z$ ; \$2  $-x+3/2, -y+2, z-1/2$ ; \$3  $x-1, y, z$ ; \$4  $-x+1, y-1/2, -z+3/2$ ; \$5  $x-1/2, -y+3/2, -z+1$ ; \$6  $-x+3/2, -y+2, z+1/2$ .

**Table S3.** emission peaks and its origin.

| complex  | $\lambda_{em}$ (nm) | VBs (HOMO)                   | CBs (LOMO)                    | origin                     |
|----------|---------------------|------------------------------|-------------------------------|----------------------------|
| HL       | 375                 | p- $\pi$ of py <sup>+</sup>  | p- $\pi^*$ of py <sup>+</sup> | intragroup $\pi$ - $\pi^*$ |
|          | 485                 | p- $\pi$ of COO <sup>-</sup> | p- $\pi^*$ of py <sup>+</sup> | intergroup $\pi$ - $\pi^*$ |
| <b>1</b> | 391                 | p- $\pi$ of py <sup>+</sup>  | p- $\pi^*$ of py <sup>+</sup> | intragroup $\pi$ - $\pi^*$ |
|          | 425                 | orbital of inorganic layer   | p- $\pi^*$ of py <sup>+</sup> | MLCT                       |
| <b>2</b> | 425                 | orbital of inorganic chain   | p- $\pi^*$ of py <sup>+</sup> | MLCT                       |
|          | 463                 | orbital of inorganic chain   | p- $\pi^*$ of py <sup>+</sup> | MLCT and                   |

|  |     |                                  |                               |                            |
|--|-----|----------------------------------|-------------------------------|----------------------------|
|  |     | and p- $\pi$ of COO <sup>-</sup> |                               | intergroup $\pi$ - $\pi^*$ |
|  | 500 | p- $\pi$ of COO <sup>-</sup>     | p- $\pi^*$ of py <sup>+</sup> | intergroup $\pi$ - $\pi^*$ |

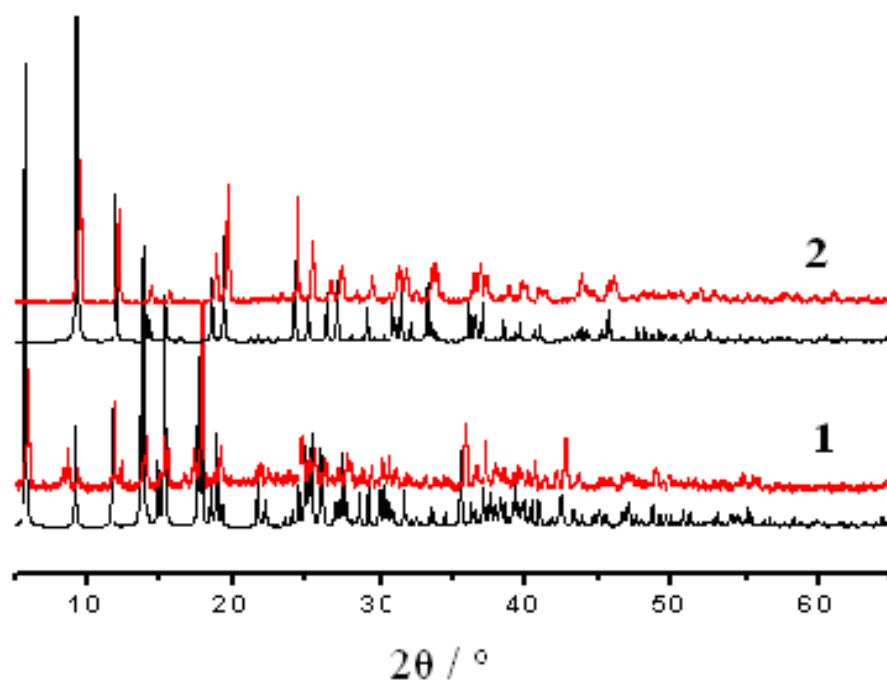

**Fig. S1.** PXRD patterns of **1** and **2**.

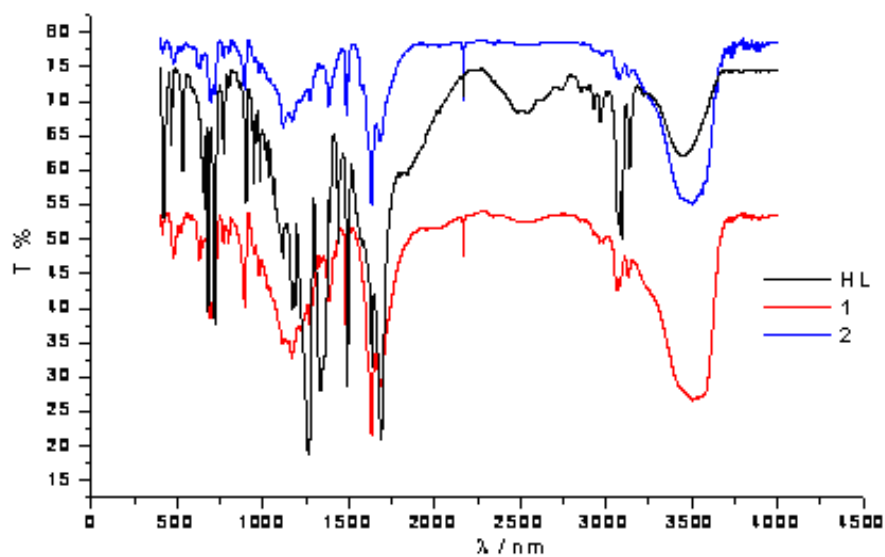

**Fig. S2.** IR spectra of HL, **1** and **2**.

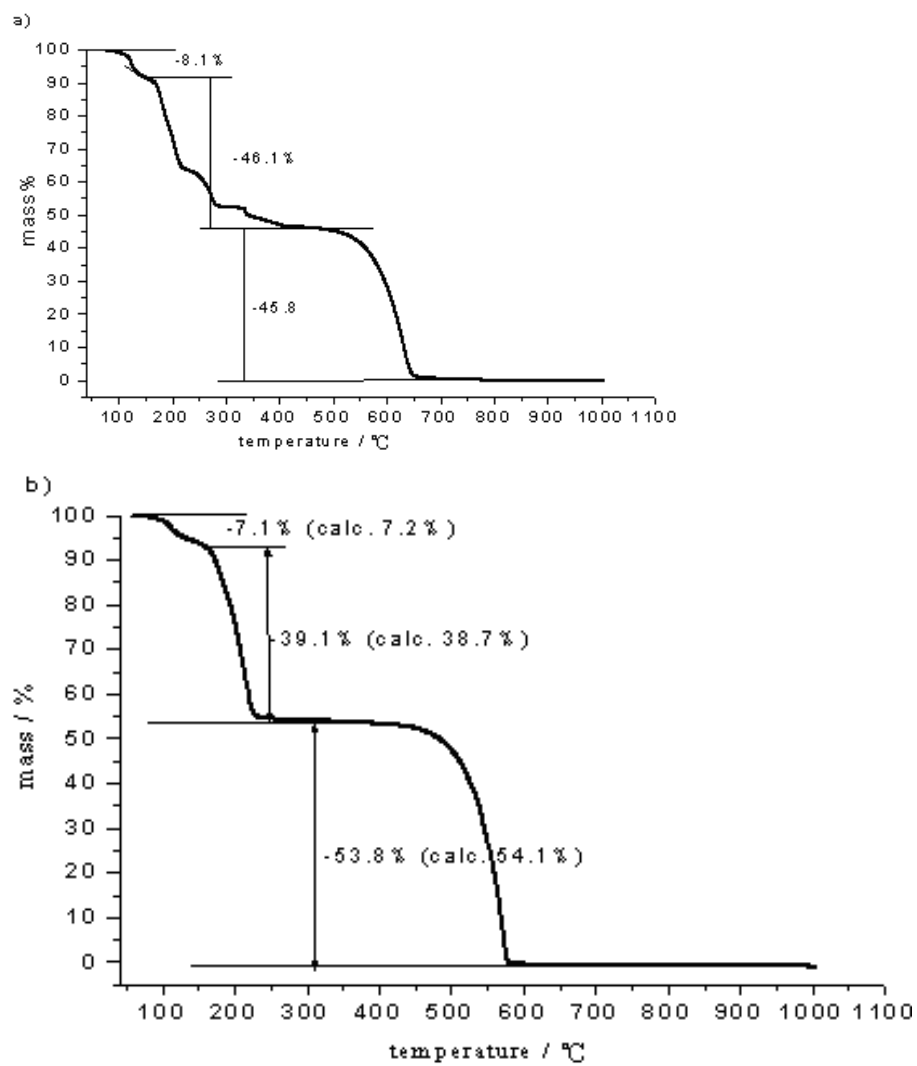

**Fig. S3.** TGA spectra of **1** (a), **2** (b).

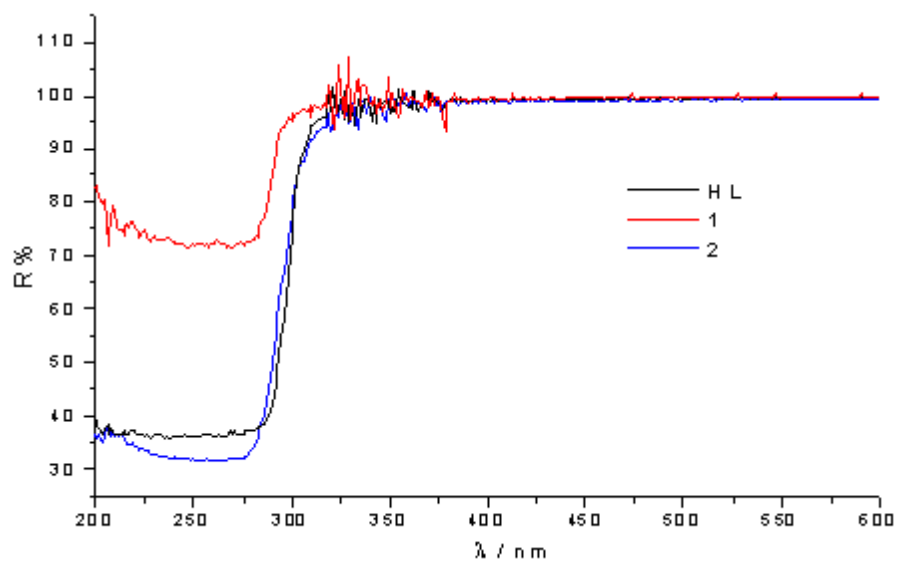

**Fig. S4.** Optical diffuse reflectance spectra for HL, **1** and **2**.
